# Supplementary material for: Microwave-Assisted Synthesis of New Substituted Anilides of Quinaldic Acid †
Source: Molecules. 2012 Jan 31;17(2):1292–306. doi: 10.3390/molecules17021292 (PMC6268041; doi:10.3390/molecules17021292)
Supplement: Supplementary file 1 [file molecules-17-01292-s001.cif]

 
data_shelxl 
 
_audit_creation_method            SHELXL-97 
_chemical_name_systematic 
; 
 ? 
; 
_chemical_name_common             ? 
_chemical_melting_point           ? 
_chemical_formula_moiety          'C16 H11 Br N2 O' 
_chemical_formula_sum 
 'C16 H11 Br N2 O' 
_chemical_formula_weight          327.18 
 
loop_ 
 _atom_type_symbol 
 _atom_type_description 
 _atom_type_scat_dispersion_real 
 _atom_type_scat_dispersion_imag 
 _atom_type_scat_source 
 'C'  'C'   0.0033   0.0016 
 'International Tables Vol C Tables 4.2.6.8 and 6.1.1.4' 
 'H'  'H'   0.0000   0.0000 
 'International Tables Vol C Tables 4.2.6.8 and 6.1.1.4' 
 'O'  'O'   0.0106   0.0060 
 'International Tables Vol C Tables 4.2.6.8 and 6.1.1.4' 
 'N'  'N'   0.0061   0.0033 
 'International Tables Vol C Tables 4.2.6.8 and 6.1.1.4' 
 'Br'  'Br'  -0.2901   2.4595 
 'International Tables Vol C Tables 4.2.6.8 and 6.1.1.4' 
 
_symmetry_cell_setting            'monoclinic' 
_symmetry_space_group_name_H-M    'P 21/c' 
_symmetry_space_group_name_Hall   '-P 2ybc'
 
loop_ 
 _symmetry_equiv_pos_as_xyz 
 'x, y, z' 
 '-x, y+1/2, -z+1/2' 
 '-x, -y, -z' 
 'x, -y-1/2, z-1/2' 
 
_cell_length_a                    6.3620(2) 
_cell_length_b                    16.9968(7) 
_cell_length_c                    12.6001(10) 
_cell_angle_alpha                 90 
_cell_angle_beta                  105.892(5) 
_cell_angle_gamma                 90 
_cell_volume                      1310.42(13) 
_cell_formula_units_Z             4 
_cell_measurement_temperature     150(1) 
_cell_measurement_reflns_used     9762 
_cell_measurement_theta_min       1 
_cell_measurement_theta_max       27.5 
 
_exptl_crystal_description        'block' 
_exptl_crystal_colour             'colourless' 
_exptl_crystal_size_max           0.33 
_exptl_crystal_size_mid           0.27 
_exptl_crystal_size_min           0.24 
_exptl_crystal_density_meas       ? 
_exptl_crystal_density_diffrn     1.658 
_exptl_crystal_density_method     'not measured' 
_exptl_crystal_F_000              656 
_exptl_absorpt_coefficient_mu     3.133 
# Absorption correction 

loop_
_exptl_crystal_face_index_h 
_exptl_crystal_face_index_k 
_exptl_crystal_face_index_l 
_exptl_crystal_face_perp_dist 
    0    1    0  0.034
    0   -1    0  0.148
    1    0    0  0.076
   -1    0    0  0.121
    0   -1    1  0.118
    0    0   -1  0.079
    0    1    1  0.090
    0   -1   -1  0.140
    0    1   -1  0.042
    1    0   -1  0.082
   -1    0    1  0.163


_exptl_absorpt_correction_type 'integration' 
_exptl_absorpt_correction_T_min  0.559
_exptl_absorpt_correction_T_max  0.671
_exptl_absorpt_process_details
;
Gaussian integration (Coppens, 1970)
;
 
_diffrn_ambient_temperature       150(1) 
_diffrn_radiation_wavelength      0.71073 
_diffrn_radiation_type            MoK\a 
_diffrn_radiation_source          'fine-focus sealed tube' 
_diffrn_radiation_monochromator   graphite 
_diffrn_measurement_device_type   'Bruker Nonius KappaCCD area detector' 
_diffrn_measurement_method        '\f and \w scans to fill the Ewald sphere'  
_diffrn_detector_area_resol_mean  9.091
_diffrn_standards_number          0
_diffrn_standards_interval_count  ? 
_diffrn_standards_interval_time   ? 
_diffrn_standards_decay_%         ? 
_diffrn_reflns_number             9690 
_diffrn_reflns_av_R_equivalents   0.0478 
_diffrn_reflns_av_sigmaI/netI     0.0428 
_diffrn_reflns_limit_h_min        -8 
_diffrn_reflns_limit_h_max        7 
_diffrn_reflns_limit_k_min        -20 
_diffrn_reflns_limit_k_max        22 
_diffrn_reflns_limit_l_min        -15 
_diffrn_reflns_limit_l_max        16 
_diffrn_reflns_theta_min          2.06 
_diffrn_reflns_theta_max          27.40 
_reflns_number_total              2941 
_reflns_number_gt                 2246 
_reflns_threshold_expression      >2sigma(I) 
 
_computing_data_collection        
'COLLECT (Hooft, 1998) and DENZO (Otwinowski & Minor, 1997)'
_computing_cell_refinement        'COLLECT and DENZO' 
_computing_data_reduction         'COLLECT and DENZO' 
_computing_structure_solution     'SIR92 (Altomare et al., 1994)' 
_computing_structure_refinement   'SHELXL-97 (Sheldrick, 1997)' 
_computing_molecular_graphics     'PLATON (Spek, 2003)'
_computing_publication_material   'SHELXL-97 (Sheldrick, 2008)' 
 
_refine_special_details 
; 
 Refinement of F^2^ against ALL reflections.  The weighted R-factor wR and 
 goodness of fit S are based on F^2^, conventional R-factors R are based 
 on F, with F set to zero for negative F^2^. The threshold expression of 
 F^2^ > 2sigma(F^2^) is used only for calculating R-factors(gt) etc. and is 
 not relevant to the choice of reflections for refinement.  R-factors based 
 on F^2^ are statistically about twice as large as those based on F, and R- 
 factors based on ALL data will be even larger. 
; 
 
_refine_ls_structure_factor_coef  Fsqd  
_refine_ls_matrix_type            full 
_refine_ls_weighting_scheme       calc  
_refine_ls_weighting_details 
 'calc w=1/[\s^2^(Fo^2^)+(0.0137P)^2^+1.5617P] where P=(Fo^2^+2Fc^2^)/3' 
_atom_sites_solution_primary      direct 
_atom_sites_solution_secondary    difmap 
_atom_sites_solution_hydrogens    geom 
_refine_ls_hydrogen_treatment     constr 
_refine_ls_extinction_method      none 
_refine_ls_extinction_coef        ? 
_refine_ls_number_reflns          2941 
_refine_ls_number_parameters      181 
_refine_ls_number_restraints      0 
_refine_ls_R_factor_all           0.0675 
_refine_ls_R_factor_gt            0.0404 
_refine_ls_wR_factor_ref          0.0775 
_refine_ls_wR_factor_gt           0.0672 
_refine_ls_goodness_of_fit_ref    1.159 
_refine_ls_restrained_S_all       1.159 
_refine_ls_shift/su_max           0.000 
_refine_ls_shift/su_mean          0.000 
 
loop_ 
 _atom_site_label 
 _atom_site_type_symbol 
 _atom_site_fract_x 
 _atom_site_fract_y 
 _atom_site_fract_z 
 _atom_site_U_iso_or_equiv 
 _atom_site_adp_type 
 _atom_site_occupancy 
 _atom_site_symmetry_multiplicity 
 _atom_site_calc_flag 
 _atom_site_refinement_flags 
 _atom_site_disorder_assembly 
 _atom_site_disorder_group 
Br1 Br 1.36197(5) 0.58952(2) 0.09757(3) 0.03722(11) Uani 1 1 d . . . 
C11 C 1.0434(4) 0.44798(17) 0.3302(2) 0.0235(6) Uani 1 1 d . . . 
N1 N 0.9404(4) 0.40539(14) 0.39724(19) 0.0250(5) Uani 1 1 d . . . 
H1 H 0.8126 0.3874 0.3649 0.030 Uiso 1 1 d R . . 
N2 N 0.6771(4) 0.31877(14) 0.48198(19) 0.0226(5) Uani 1 1 d . . . 
O1 O 1.1941(3) 0.41055(14) 0.56582(17) 0.0349(5) Uani 1 1 d . . . 
C14 C 1.2305(5) 0.53124(17) 0.1908(3) 0.0268(6) Uani 1 1 d . . . 
C1 C 0.8646(4) 0.33971(16) 0.5512(2) 0.0224(6) Uani 1 1 d . . . 
C2 C 0.5417(4) 0.27191(16) 0.5224(2) 0.0226(6) Uani 1 1 d . . . 
C7 C 0.5988(4) 0.24565(17) 0.6332(2) 0.0236(6) Uani 1 1 d . . . 
C10 C 1.0178(5) 0.38945(17) 0.5067(3) 0.0255(6) Uani 1 1 d . . . 
C3 C 0.3392(5) 0.24829(17) 0.4499(3) 0.0259(6) Uani 1 1 d . . . 
H3 H 0.2995 0.2655 0.3770 0.031 Uiso 1 1 d R . . 
C6 C 0.4525(5) 0.19637(18) 0.6681(3) 0.0301(7) Uani 1 1 d . . . 
H6 H 0.4879 0.1791 0.7409 0.036 Uiso 1 1 d R . . 
C12 C 0.9184(4) 0.47039(17) 0.2257(3) 0.0262(6) Uani 1 1 d . . . 
H12 H 0.7710 0.4571 0.2028 0.031 Uiso 1 1 d R . . 
C5 C 0.2592(5) 0.17403(18) 0.5968(3) 0.0313(7) Uani 1 1 d . . . 
H5 H 0.1651 0.1410 0.6208 0.038 Uiso 1 1 d R . . 
C16 C 1.2653(4) 0.46742(18) 0.3636(3) 0.0276(7) Uani 1 1 d . . . 
H16 H 1.3510 0.4523 0.4329 0.033 Uiso 1 1 d R . . 
C8 C 0.8008(5) 0.27028(19) 0.7034(2) 0.0299(7) Uani 1 1 d . . . 
H8 H 0.8429 0.2545 0.7769 0.036 Uiso 1 1 d R . . 
C13 C 1.0098(5) 0.51232(18) 0.1556(3) 0.0285(7) Uani 1 1 d . . . 
H13 H 0.9251 0.5273 0.0861 0.034 Uiso 1 1 d R . . 
C15 C 1.3583(5) 0.50915(17) 0.2942(3) 0.0290(7) Uani 1 1 d . . . 
H15 H 1.5058 0.5223 0.3166 0.035 Uiso 1 1 d R . . 
C4 C 0.2029(5) 0.20060(18) 0.4869(3) 0.0293(7) Uani 1 1 d . . . 
H4 H 0.0703 0.1853 0.4389 0.035 Uiso 1 1 d R . . 
C9 C 0.9341(5) 0.31771(18) 0.6630(2) 0.0281(7) Uani 1 1 d . . . 
H9 H 1.0677 0.3349 0.7080 0.034 Uiso 1 1 d R . . 
 
loop_ 
 _atom_site_aniso_label 
 _atom_site_aniso_U_11 
 _atom_site_aniso_U_22 
 _atom_site_aniso_U_33 
 _atom_site_aniso_U_23 
 _atom_site_aniso_U_13 
 _atom_site_aniso_U_12 
Br1 0.03099(17) 0.03780(19) 0.0466(2) 0.00831(17) 0.01695(13) -0.00358(16) 
C11 0.0214(13) 0.0175(14) 0.0319(17) -0.0016(12) 0.0079(12) -0.0014(12) 
N1 0.0199(11) 0.0244(13) 0.0288(13) 0.0010(11) 0.0032(10) -0.0055(10) 
N2 0.0234(12) 0.0223(12) 0.0220(13) -0.0005(10) 0.0061(10) 0.0012(10) 
O1 0.0273(11) 0.0422(13) 0.0332(12) -0.0103(11) 0.0051(9) -0.0121(11) 
C14 0.0261(15) 0.0197(15) 0.0381(18) -0.0040(13) 0.0148(13) -0.0024(12) 
C1 0.0226(14) 0.0184(14) 0.0269(16) -0.0038(12) 0.0080(12) 0.0017(11) 
C2 0.0259(14) 0.0179(14) 0.0248(16) -0.0038(12) 0.0085(12) 0.0003(12) 
C7 0.0261(15) 0.0209(14) 0.0238(16) -0.0020(12) 0.0067(12) 0.0053(12) 
C10 0.0242(14) 0.0225(15) 0.0305(17) -0.0078(12) 0.0091(12) 0.0001(12) 
C3 0.0267(14) 0.0261(16) 0.0247(16) 0.0002(12) 0.0067(12) 0.0005(12) 
C6 0.0374(17) 0.0260(16) 0.0311(18) 0.0054(13) 0.0163(14) 0.0065(14) 
C12 0.0191(13) 0.0229(15) 0.0365(18) -0.0022(13) 0.0075(12) -0.0010(12) 
C5 0.0338(16) 0.0235(16) 0.0413(19) 0.0052(14) 0.0183(14) 0.0002(14) 
C16 0.0211(14) 0.0265(16) 0.0337(18) -0.0005(13) 0.0049(12) 0.0012(12) 
C8 0.0345(17) 0.0343(17) 0.0184(16) 0.0013(13) 0.0031(13) 0.0053(14) 
C13 0.0267(15) 0.0261(16) 0.0325(17) -0.0004(13) 0.0077(13) 0.0033(13) 
C15 0.0209(14) 0.0256(16) 0.0400(19) -0.0047(14) 0.0075(13) -0.0028(12) 
C4 0.0278(15) 0.0252(16) 0.0355(18) -0.0016(13) 0.0097(13) -0.0036(13) 
C9 0.0283(15) 0.0298(17) 0.0226(16) -0.0068(13) 0.0010(12) 0.0000(13) 
 
_geom_special_details 
; 
 All esds (except the esd in the dihedral angle between two l.s. planes) 
 are estimated using the full covariance matrix.  The cell esds are taken 
 into account individually in the estimation of esds in distances, angles 
 and torsion angles; correlations between esds in cell parameters are only 
 used when they are defined by crystal symmetry.  An approximate (isotropic) 
 treatment of cell esds is used for estimating esds involving l.s. planes. 
; 
 
loop_ 
 _geom_bond_atom_site_label_1 
 _geom_bond_atom_site_label_2 
 _geom_bond_distance 
 _geom_bond_site_symmetry_2 
 _geom_bond_publ_flag 
Br1 C14 1.897(3) . ? 
C11 C12 1.393(4) . ? 
C11 C16 1.398(4) . ? 
C11 N1 1.404(4) . ? 
N1 C10 1.359(4) . ? 
N1 H1 0.8599 . ? 
N2 C1 1.320(4) . ? 
N2 C2 1.370(4) . ? 
O1 C10 1.218(3) . ? 
C14 C15 1.385(4) . ? 
C14 C13 1.389(4) . ? 
C1 C9 1.406(4) . ? 
C1 C10 1.509(4) . ? 
C2 C7 1.415(4) . ? 
C2 C3 1.419(4) . ? 
C7 C6 1.409(4) . ? 
C7 C8 1.410(4) . ? 
C3 C4 1.359(4) . ? 
C3 H3 0.9300 . ? 
C6 C5 1.363(4) . ? 
C6 H6 0.9300 . ? 
C12 C13 1.381(4) . ? 
C12 H12 0.9301 . ? 
C5 C4 1.406(4) . ? 
C5 H5 0.9299 . ? 
C16 C15 1.379(4) . ? 
C16 H16 0.9300 . ? 
C8 C9 1.366(4) . ? 
C8 H8 0.9299 . ? 
C13 H13 0.9299 . ? 
C15 H15 0.9300 . ? 
C4 H4 0.9301 . ? 
C9 H9 0.9300 . ? 
 
loop_ 
 _geom_angle_atom_site_label_1 
 _geom_angle_atom_site_label_2 
 _geom_angle_atom_site_label_3 
 _geom_angle 
 _geom_angle_site_symmetry_1 
 _geom_angle_site_symmetry_3 
 _geom_angle_publ_flag 
C12 C11 C16 119.2(3) . . ? 
C12 C11 N1 118.0(2) . . ? 
C16 C11 N1 122.7(3) . . ? 
C10 N1 C11 127.9(2) . . ? 
C10 N1 H1 116.3 . . ? 
C11 N1 H1 115.8 . . ? 
C1 N2 C2 117.2(2) . . ? 
C15 C14 C13 121.3(3) . . ? 
C15 C14 Br1 118.6(2) . . ? 
C13 C14 Br1 120.1(2) . . ? 
N2 C1 C9 124.8(3) . . ? 
N2 C1 C10 117.6(3) . . ? 
C9 C1 C10 117.6(3) . . ? 
N2 C2 C7 122.2(3) . . ? 
N2 C2 C3 118.5(3) . . ? 
C7 C2 C3 119.2(3) . . ? 
C6 C7 C8 123.2(3) . . ? 
C6 C7 C2 118.9(3) . . ? 
C8 C7 C2 118.0(3) . . ? 
O1 C10 N1 125.4(3) . . ? 
O1 C10 C1 121.2(3) . . ? 
N1 C10 C1 113.4(2) . . ? 
C4 C3 C2 120.0(3) . . ? 
C4 C3 H3 120.0 . . ? 
C2 C3 H3 120.0 . . ? 
C5 C6 C7 120.9(3) . . ? 
C5 C6 H6 119.6 . . ? 
C7 C6 H6 119.5 . . ? 
C13 C12 C11 121.0(3) . . ? 
C13 C12 H12 119.5 . . ? 
C11 C12 H12 119.5 . . ? 
C6 C5 C4 120.0(3) . . ? 
C6 C5 H5 119.9 . . ? 
C4 C5 H5 120.1 . . ? 
C15 C16 C11 120.3(3) . . ? 
C15 C16 H16 119.7 . . ? 
C11 C16 H16 120.1 . . ? 
C9 C8 C7 119.6(3) . . ? 
C9 C8 H8 120.2 . . ? 
C7 C8 H8 120.2 . . ? 
C12 C13 C14 118.8(3) . . ? 
C12 C13 H13 120.5 . . ? 
C14 C13 H13 120.8 . . ? 
C16 C15 C14 119.5(3) . . ? 
C16 C15 H15 120.2 . . ? 
C14 C15 H15 120.3 . . ? 
C3 C4 C5 121.0(3) . . ? 
C3 C4 H4 119.6 . . ? 
C5 C4 H4 119.4 . . ? 
C8 C9 C1 118.3(3) . . ? 
C8 C9 H9 121.0 . . ? 
C1 C9 H9 120.8 . . ? 
 
loop_ 
 _geom_hbond_atom_site_label_D 
 _geom_hbond_atom_site_label_H 
 _geom_hbond_atom_site_label_A 
 _geom_hbond_distance_DH 
 _geom_hbond_distance_HA 
 _geom_hbond_distance_DA 
 _geom_hbond_angle_DHA 
 _geom_hbond_site_symmetry_A 
N1 H1 N2  0.86 2.23 2.663(3) 111.0 . 
 
_diffrn_measured_fraction_theta_max    0.987 
_diffrn_reflns_theta_full              27.40 
_diffrn_measured_fraction_theta_full   0.987 
_refine_diff_density_max    0.324 
_refine_diff_density_min   -0.389 
_refine_diff_density_rms    0.083 
